# Supplementary material for: Development of Carvedilol Nanoformulation-Loaded Poloxamer-Based In Situ Gel for the Management of Glaucoma
Source: MDPI journal article supplement (doi:10.3390/gels9120952), 2023-12-04
Supplement: s1 [file s1]

**Table S1.** Grading of ocular irritation by Draize irritation test in rabbits.

| <b>Conjunctiva</b>    | <b>Control</b> | <b>CRV Formulations</b> |                         |
|-----------------------|----------------|-------------------------|-------------------------|
|                       |                | <b>CRV-ISG</b>          | <b>Optimized CS-ISG</b> |
| Degree of redness     | 0              | 0                       | 0                       |
| Degree of swelling    | 0              | 0                       | 0                       |
| Secretion (discharge) | 0              | 0                       | 0                       |

Degree of swelling, discharge and redness were grade on scale from 0 to 3. Score 0 indicates no redness, inflammation, or excessive tearing; 1 indicates mild redness with inflammation and minimal tears; 2 indicates moderate redness with considerable inflammation and significant tearing; and 3 indicates severe redness with severe inflammation and extensive tearing.
